# Supplementary material for: Stretchability—The Metric for Stretchable Electrical Interconnects
Source: PubMed Central journal article supplement (PMC6187273; doi:10.3390/mi9080382), 2018-08-01
Supplement: micromachines-09-00382-s001.pdf [file micromachines-09-00382-s001.pdf]

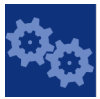

# Supplementary Materials: Stretchability—The Metric for Stretchable Electrical Interconnects

Bart Plovie, Frederick Bossuyt and Jan Vanfleteren

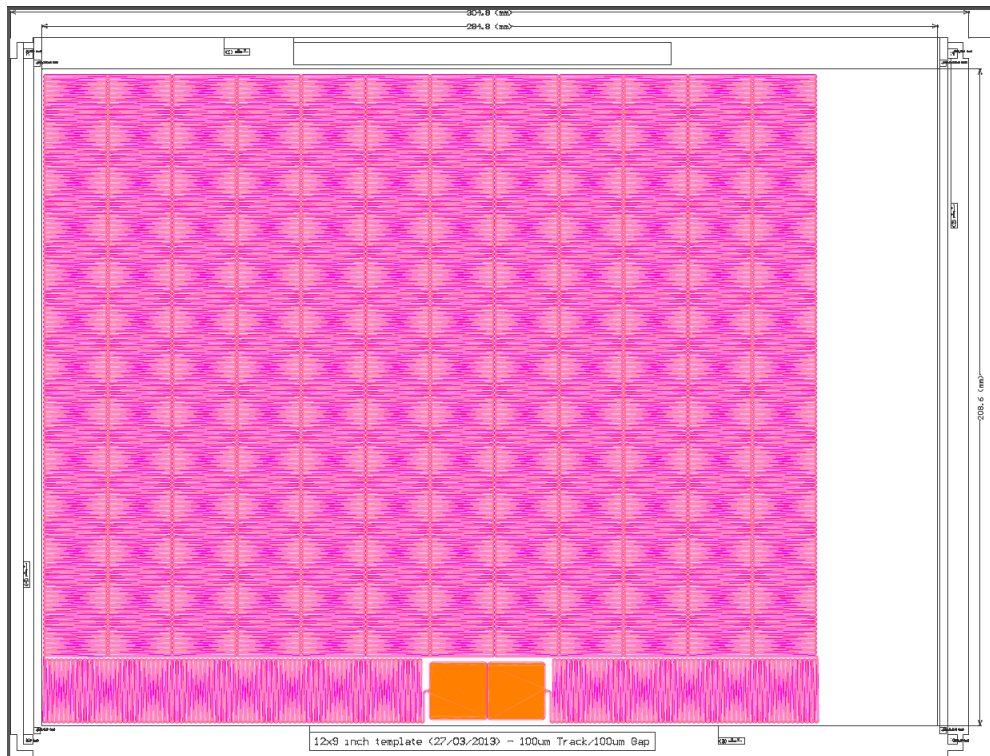

Figure S1. AutoCAD circuit design file for the 60-meter meander.

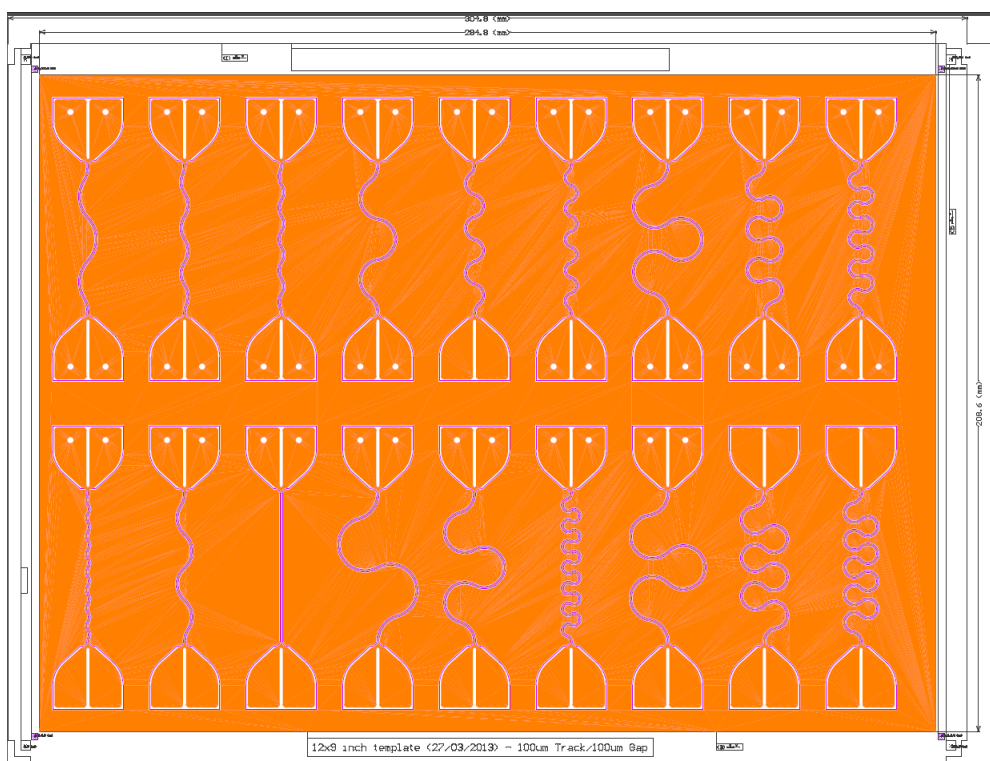

Figure S2. AutoCAD circuit design file for the meanders tested using the tensile tester.
